# Supplementary material
Source: PubMed Central journal article supplement (PMC6858885)
Supplement: EMS84175-supplement-2.pdf [file EMS84175-supplement-2.pdf]

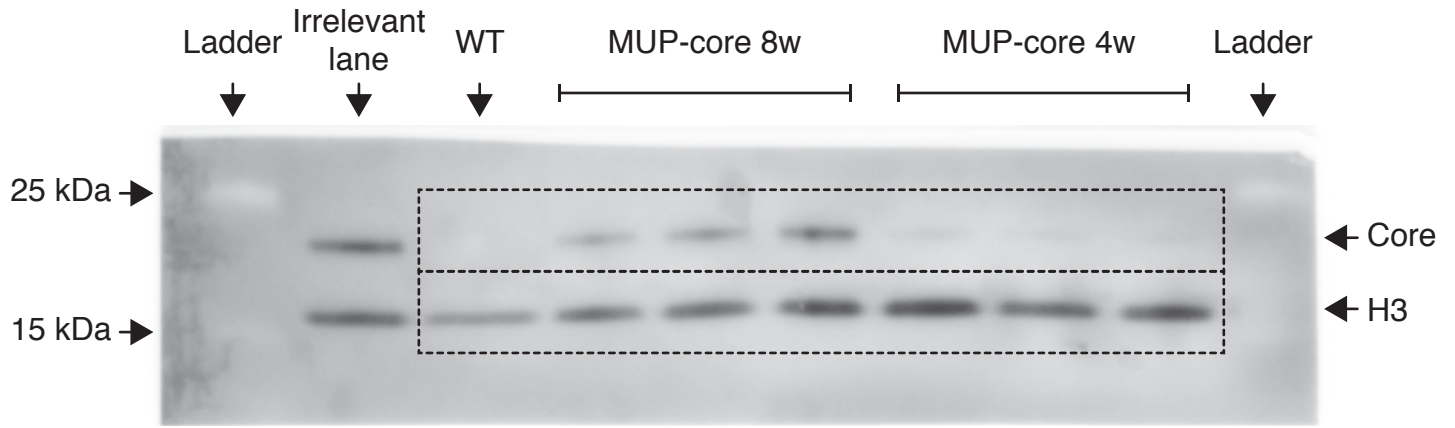

**Original membrane of western blot shown in extended data 4(g)**

Dotted lines indicate where the image was cropped. Core staining (upper lane) and nuclear loading control protein (H3) were revealed sequentially on the same membrane as shown.

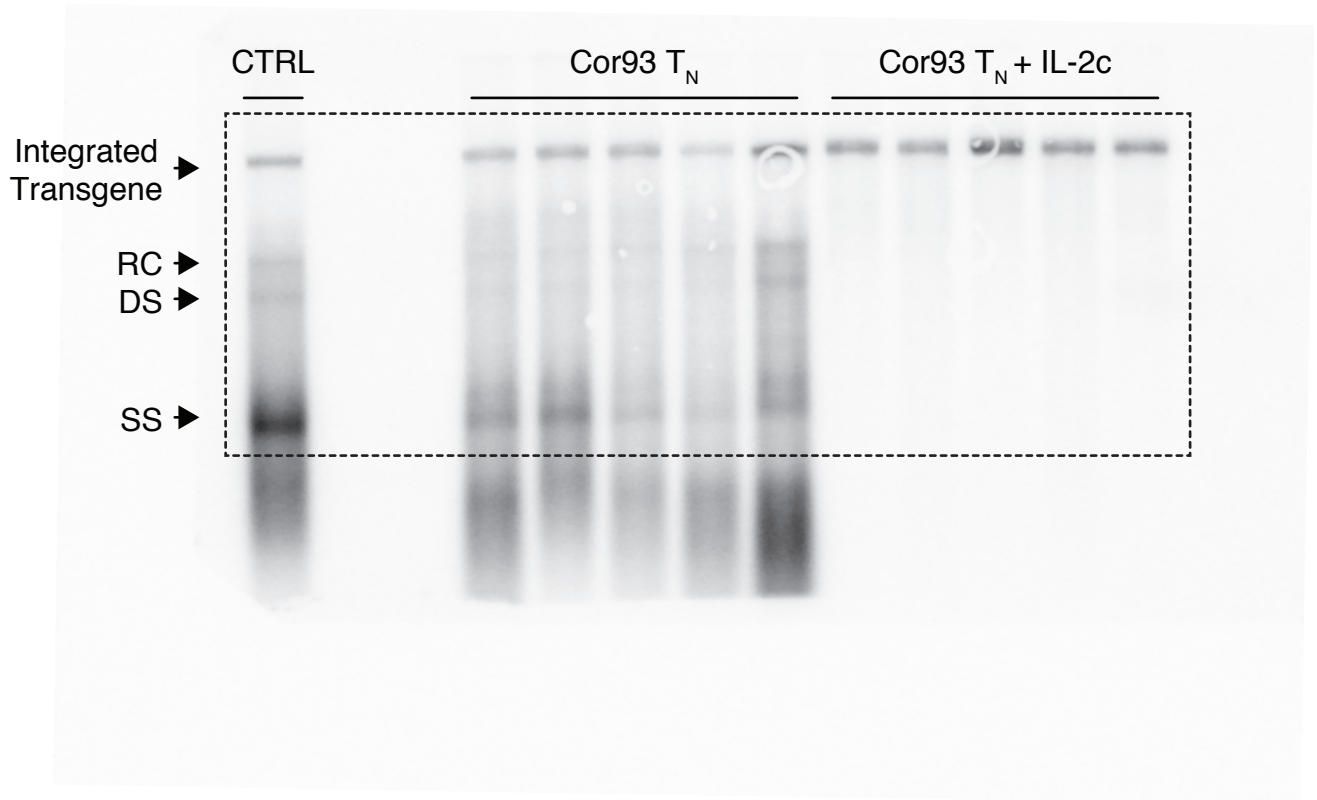

**Original membrane of southern blot shown in extended data 9(e)**  
Dotted lines indicate where the image was cropped.
